CORRECTION

# Correction: Regulation of Adipogenesis and Key Adipogenic Gene Expression by 1, 25-Dihydroxyvitamin D in 3T3-L1 Cells

Shuhan Ji, Matthew E. Doumit, Rodney A. Hill

The following information is missing from the funding section: The Department of Animal and Veterinary Science, College of Agriculture and Life Sciences, University of Idaho.

## Reference

1. Ji S, Doumit ME, Hill RA (2015) Regulation of Adipogenesis and Key Adipogenic Gene Expression by 1, 25-Dihydroxyvitamin D in 3T3-L1 Cells. PLoS ONE 10(6): e0126142. doi:[10.1371/journal.pone.0126142](https://doi.org/10.1371/journal.pone.0126142) PMID: [26030589](https://pubmed.ncbi.nlm.nih.gov/26030589/)

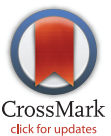

## OPEN ACCESS

**Citation:** Ji S, Doumit ME, Hill RA (2015) Correction: Regulation of Adipogenesis and Key Adipogenic Gene Expression by 1, 25-Dihydroxyvitamin D in 3T3-L1 Cells. PLoS ONE 10(7): e0134199. doi:[10.1371/journal.pone.0134199](https://doi.org/10.1371/journal.pone.0134199)

**Published:** July 24, 2015

**Copyright:** © 2015 Ji et al. This is an open access article distributed under the terms of the [Creative Commons Attribution License](https://creativecommons.org/licenses/by/4.0/), which permits unrestricted use, distribution, and reproduction in any medium, provided the original author and source are credited.
